# Supplementary material for: Multiple headspace solid-phase micro-extraction for the total content determination of tetramethylpyrazine in various vinegar samples by GC-FID
Source: Royal Society of Chemistry journal article supplement (doi:10.1039/c8ay02816h), 2019-01-01
Supplement: c8ay02816h1.pdf [file c8ay02816h1.pdf]

Figure S1 Influence of salts (NaCl and Na<sub>2</sub>SO<sub>4</sub>) on multiple headspace solid-phase micro-extraction (MHS-SPME).

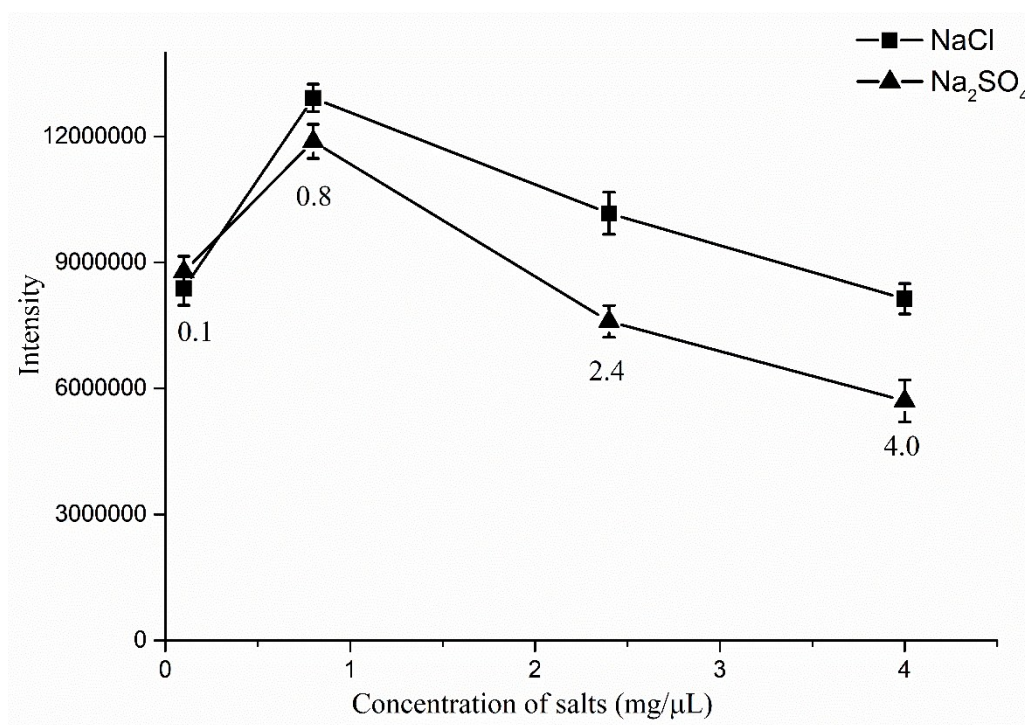

Figure S1
